# Supplementary material for: Complement-dependent neuroinflammation in spinal cord injury: from pathology to therapeutic implications
Source: PubMed Central journal article supplement — Neural Regen Res. 2024 Jun 3;20(5):1324–35. doi: 10.4103/NRR.NRR-D-24-00116 (PMC11624873; doi:10.4103/nrr.nrr-d-24-00116), 2024-06-03
Supplement: NRR-20-1324_Suppl1.pdf [file NRR-20-1324_Suppl1.pdf]

| Additional Table 1 Summary of studies reporting complement activation and deposition after SCI |                     |                       |                         |              |                  |                                                                                                                                                                                                                                                                                                                        |
|------------------------------------------------------------------------------------------------|---------------------|-----------------------|-------------------------|--------------|------------------|------------------------------------------------------------------------------------------------------------------------------------------------------------------------------------------------------------------------------------------------------------------------------------------------------------------------|
| Study                                                                                          | Species             | Model                 | Model detail            | Groups       | Time from injury | SCI associated changes                                                                                                                                                                                                                                                                                                 |
| Anderson et al., 2004                                                                          | Long Evans rats     | Contusion-induced SCI | Weight drop T10-12      | SCI vs. Sham | 1 and 42 days    | Deposition of <b>C1q, fB, C3b, and C5b-9</b> on neurons and glia                                                                                                                                                                                                                                                       |
| Qiao et al., 2006                                                                              | C57bl6 mice         | Contusion-induced SCI | Weight drop T12         | SCI vs. Sham | 1 and 3 days     | Perilesional deposition of <b>C3</b> , more prominent on day 3 versus 1                                                                                                                                                                                                                                                |
| Brennan et al., 2015                                                                           | C57bl6 mice         | Contusion-induced SCI | Controlled impactor T9  | SCI vs. Sham | 4 and 7 days     | Increased spinal cord and plasma <b>C5a</b> levels                                                                                                                                                                                                                                                                     |
| Anderson et al., 2005                                                                          | Long Evans rats     | Contusion-induced SCI | Weight drop T10-12      | SCI vs. Sham | 1 and 42 days    | Increased <b>fB</b> and <b>clusterin</b> deposition rostral and caudal to injury, starts within 1 day and persists to at least 42 days after injury                                                                                                                                                                    |
| Nguyen et al., 2008                                                                            | Sprague Dawley rats | Contusion-induced SCI | Controlled impactor T9  | SCI vs. Sham | 42 days          | <ul style="list-style-type: none"> <li>- Infiltrating polymorphonuclear cells after SCI with increased <b>C1q, C3, and - C4</b> mRNA expression.</li> <li>- Same cells also expressed <b>CD59</b> on surface</li> <li>- <b>MAC/C5b-9</b> proteins noted in granular vesicles within polymorphonuclear cells</li> </ul> |
| Narang et al., 2017                                                                            | C57bl6 mice         | Contusion-induced SCI | Controlled impactor T10 | SCI vs. Sham | 21 days          | Co-localization of <b>IgM and C3b/d</b> deposition in injury and perilesional spinal cord                                                                                                                                                                                                                              |
| Zhao et al., 2019                                                                              | Wistar rats         | Hemi-section          | T10                     | SCI vs. Sham | 3 days           | <ul style="list-style-type: none"> <li>- Increased mRNA expression of <b>C1q, C3, C4b, C6, MBL, CFH, CFP, and C5</b> in spinal cord</li> <li>- Higher deposition of C1q on neurons and glial cells</li> </ul>                                                                                                          |
| Qiao et al., 2010                                                                              | C57bl6 mice         | Contusion-induced SCI | Weight drop T12         | SCI vs. Sham | 1 and 3 days     | Higher deposition of <b>C3d, fB, and C9</b> in the spinal cord at 1 and 3 days                                                                                                                                                                                                                                         |

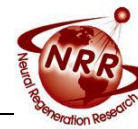

|                      |                     |                       |                        |              |                   |                                                                                                                                                     |
|----------------------|---------------------|-----------------------|------------------------|--------------|-------------------|-----------------------------------------------------------------------------------------------------------------------------------------------------|
| Li et al., 2009      | Sprague Dawley rats | Contusion-induced SCI | Weight drop T10        | SCI vs. Sham | 1, 7, and 14 days | Higher deposition of C3 and C9 noted in spinal cord parenchyma, peak at day 3                                                                       |
| Hao et al., 2018     | C57bl6 mice         | Contusion-induced SCI | Controlled impactor T9 | SCI vs. Sham | 9 days            | - Transcriptomic analysis showing increased <b>C3</b> expression following SCI<br>- Complement <b>C3</b> expression more prominent in younger mice  |
| Ankeny et al., 2009  | C57bl6 mice         | Contusion-induced SCI | Controlled impactor T9 | SCI vs. Sham | 7 days            | - Higher <b>IgG and C1q</b> deposition on neurons, endothelial cells, and glial cells after SCI<br>- Co-localization of <b>IgG and C1q</b> deposits |
| Brennan et al., 2019 | C57bl6 mice         | Contusion-induced SCI | Controlled impactor T9 | SCI vs. Sham | 4 and 35 days     | - Increased C3a levels in the spinal cord and plasma up to 4 days post-injury<br>- Upregulation of C3aR by microglia up to 35 days post-injury      |
| Liu et al., 1998     | Wistar rats         | Contusion-induced SCI | Weight drop T10        | SCI vs. Sham | 7 days            | - Proteomics analysis revealed <b>complement and coagulation cascade</b> as top enriched<br>- <b>C3</b> among core upregulated proteins at 7 days   |

C3aR: C3a receptor; CFH: complement factor H; CFP: complement factor P ; fB: factor B; IgG: immunoglobulin G; IgM: immunoglobulin M; MAC: membrane attack complex; MBL: mannan-binding lectin; SCI: spinal cord injury.
