# Supplementary material for: Complement-dependent neuroinflammation in spinal cord injury: from pathology to therapeutic implications
Source: PubMed Central journal article supplement — Neural Regen Res. 2024 Jun 3;20(5):1324–35. doi: 10.4103/NRR.NRR-D-24-00116 (PMC11624873; doi:10.4103/nrr.nrr-d-24-00116), 2024-06-03
Supplement: NRR-20-1324_Suppl2.pdf [file NRR-20-1324_Suppl2.pdf]

| Additional Table 2 Summary of studies targeting complement activation after SCI |             |                         |                                                              |                |           |                                                                                                                                                                                                                                                        |                                                                                                                                                                                                                                                                                                    |
|---------------------------------------------------------------------------------|-------------|-------------------------|--------------------------------------------------------------|----------------|-----------|--------------------------------------------------------------------------------------------------------------------------------------------------------------------------------------------------------------------------------------------------------|----------------------------------------------------------------------------------------------------------------------------------------------------------------------------------------------------------------------------------------------------------------------------------------------------|
| Study                                                                           | Species     | Model detail            | Intervention groups                                          | Treatment time | Follow-up | Histological outcomes                                                                                                                                                                                                                                  | Functional outcomes                                                                                                                                                                                                                                                                                |
| <b>A. Inhibitors of Ig-Complement Interaction/Activation (Figure 4.1)</b>       |             |                         |                                                              |                |           |                                                                                                                                                                                                                                                        |                                                                                                                                                                                                                                                                                                    |
| Ankeny et al., 2009                                                             | C57bl6 mice | Controlled impactor T9  | WT<br>B-cell Depletion<br>WT SCI serum<br>FcγR -/-<br>C3 -/- | NA             | 7-63 days | - <b>B-cell depletion</b> reduced immunoglobulin and C1q deposition on neurons and glial cells after SCI<br>- SCI leads to production of pathologic IgG and IgM autoantibodies                                                                         | - B-cell depletion improved hindlimb-forelimb coordination starting 1 week post-injury<br>- Serum (IgG and IgM) from SCI mice reconstituted injury in intact SC<br>- Pathologic effect of IgM and IgG was mitigated with FcγR or C3 deficiency.                                                    |
| Narang et al., 2017                                                             | C57bl6 mice | Controlled impactor T10 | WT<br>Rag1-/-<br>B-cell Depletion<br>B4-Crry                 | 30 min         | 21 days   | <b>Rag1-/- or B-cell depletion</b><br>→ Reduced lesion volume and demyelination<br><b>B4IgM or C2-IgM</b><br>→ Reconstituted injury in Rag1-/- mice<br><b>B4-Crry</b><br>→ Reduced lesion volume and demyelination<br>→ Reduced IgM and C3d deposition | - Motor recovery significantly improved in antibody deficient (Rag1-/-) or B cell depleted mice compared to WT<br>- Administration of B4 or C2 IgM resulted in worsening of motor recovery in Rag1-/- mice<br>- B4-Crry resulted in acute and chronic improvement in motor recovery compared to WT |
| <b>B. Inhibition of Classical Complement Pathway (Figure 4.2)</b>               |             |                         |                                                              |                |           |                                                                                                                                                                                                                                                        |                                                                                                                                                                                                                                                                                                    |
| Galvan et al., 2008                                                             | BUB mice    | Controlled impactor T9  | WT<br>C1q-/-                                                 | NA             | 28 days   | <b>C1q-/-:</b><br>→ reduced lesion volume and demyelination<br>→ No effect on astrocyte activation<br>→ No effect on immune cell infiltrate                                                                                                            | C1q deficiency improved fine motor recovery                                                                                                                                                                                                                                                        |
| Tei et al., 2008                                                                | Wistar rats | Controlled impactor T12 | WT+Vehicle<br>WT+C1INH                                       | 0-30 min       | 7 days    | <b>C1-INH:</b><br>→ reduced lesion volume and demyelination<br>→ Decreased neutrophil infiltration                                                                                                                                                     | C1 INH improved motor recovery starting at day 7 post SCI                                                                                                                                                                                                                                          |
| <b>C. Inhibition of C3 Activation (Figure 4.3)</b>                              |             |                         |                                                              |                |           |                                                                                                                                                                                                                                                        |                                                                                                                                                                                                                                                                                                    |

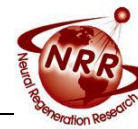

|                                                                        |                     |                        |                                         |                |           |                                                                                                                                                                                                                                                                     |                                                                                         |
|------------------------------------------------------------------------|---------------------|------------------------|-----------------------------------------|----------------|-----------|---------------------------------------------------------------------------------------------------------------------------------------------------------------------------------------------------------------------------------------------------------------------|-----------------------------------------------------------------------------------------|
| Li et al., 2005                                                        | Sprague Dawley rats | Weight drop T10        | WT<br>WT+sCR1                           | Day 1          | 3-21 days | sCR1<br>→ reduced C3 deposition<br>→ reduced neutrophil infiltration                                                                                                                                                                                                | Improved motor function days 3-21 with acute sCR1 treatment                             |
| Guo et al., 2023                                                       | C57bl6 mice         | Weight drop T12        | WT<br>C3-/-                             | NA             | 21 days   | <b>C3-/-:</b><br>→ <b>Improved nerve fiber regeneration</b><br>→ <b>Suppressed astrocyte activation</b><br>→ <b>Protected neurite formation in dorsal root ganglion neurons <i>in vitro</i> when co-cultured with astrocytes</b>                                    | C3-/- improved locomotor function on days 4-21                                          |
| Qiao et al., 2006                                                      | C57bl6 mice         | Weight drop T12        | WT<br>C3-/-<br>CR2-Crry                 | 1 hour         | 21 days   | C3-/- or CR2Crry:<br>→ Reduced lesion volume & demyelination<br>→ Inhibited acute and chronic neutrophil infiltration                                                                                                                                               | C3-/- or CR2-Crry administration improved locomotor function on days 4-21               |
| <b>D. Inhibition of Alternative and Terminal Pathways (Figure 4.4)</b> |                     |                        |                                         |                |           |                                                                                                                                                                                                                                                                     |                                                                                         |
| Qiao et al., 2010                                                      | C57bl6 mice         | Weight drop T12        | WT<br>fB-/-<br>CD59-/-<br>WT+anti-fB Ig | 1 and 13 hours | 21 days   | <b>fB -/- or anti-fB:</b><br>→ Reduced lesion volume & demyelination<br>→ Inhibited acute neutrophil and monocyte infiltrate<br>→ Reduced C3 and C9 deposition<br><b>CD59-/-:</b><br>→ High deposition of C9<br>→ Increased lesion volume and neutrophil infiltrate | Locomotor function improved in fB-/- and anti-fB treated mice and worsened with CD59-/- |
| Su et al. 2020                                                         | PVG rats            | Controlled impactor T9 | WT<br>C6-/-                             | NA             | 42 days   | No significant difference in lesion volume when C6-/- compared to WT littermates                                                                                                                                                                                    | Worse motor performance with C6-/-                                                      |
| <b>E. Inhibition of C3a/C3aR Interaction (Figure 4.5)</b>              |                     |                        |                                         |                |           |                                                                                                                                                                                                                                                                     |                                                                                         |



|                                                           |                     |                         |                                                       |                    |          |                                                                                                                                                                                                                                                                                                                                                                                                                                                                                                                                                                                                           |                                                                                                                                                                                                                                                                                                                                                                                                                       |
|-----------------------------------------------------------|---------------------|-------------------------|-------------------------------------------------------|--------------------|----------|-----------------------------------------------------------------------------------------------------------------------------------------------------------------------------------------------------------------------------------------------------------------------------------------------------------------------------------------------------------------------------------------------------------------------------------------------------------------------------------------------------------------------------------------------------------------------------------------------------------|-----------------------------------------------------------------------------------------------------------------------------------------------------------------------------------------------------------------------------------------------------------------------------------------------------------------------------------------------------------------------------------------------------------------------|
| Brennan et al., 2019                                      | C57bl6 mice         | Controlled impactor T9  | WT<br>C3aR-/-<br>C3aR-/- → WT BMC<br>WT → C3aR-/- BMC | Day 1-7            | 35 days  | <p><b>C3aR-/-:</b></p> <ul style="list-style-type: none"> <li>→ Exacerbate lesion volume and demyelination chronically, effect suppressed with neutrophil depletion</li> <li>→ Increased neutrophil infiltration</li> </ul> <p><b>C3aR-/- (CNS Chimera):</b></p> <ul style="list-style-type: none"> <li>- no effect on lesion or neutrophil infiltration</li> </ul> <p><b>C3aR-/- (BM Chimera):</b></p> <ul style="list-style-type: none"> <li>- increased neutrophil infiltration</li> </ul>                                                                                                             | C3aR-/- results in worsening of motor outcome after SCI via disinhibition of neutrophil mobilization                                                                                                                                                                                                                                                                                                                  |
| <b>F. Inhibition of C5a/C5aR Interaction (Figure 4.6)</b> |                     |                         |                                                       |                    |          |                                                                                                                                                                                                                                                                                                                                                                                                                                                                                                                                                                                                           |                                                                                                                                                                                                                                                                                                                                                                                                                       |
| Beck et al., 2010                                         | Sprague Dawley rats | Controlled impactor T9  | WT<br>WT + C5aR1A                                     | 1-7 or 14-28 days  | 180 days | <p><b>PMX205 (C5aR1A):</b></p> <ul style="list-style-type: none"> <li>→ reduced macrophage infiltration on day 7</li> <li>→ Subacute (14-28) treatment reduced myelin regeneration</li> </ul>                                                                                                                                                                                                                                                                                                                                                                                                             | Worse locomotor function and motor coordination with subacute PMX205 treatment                                                                                                                                                                                                                                                                                                                                        |
| Li et al., 2014                                           | C57bl6 mice         | Forceps compression T11 | WT<br>WT + C5aR1A<br>C5 -/-                           | Pre-injury & Day 1 | 28 days  | <p><b>C5-/- or C5aR1A:</b></p> <ul style="list-style-type: none"> <li>→ Decreased SC atrophy &amp; demyelination</li> <li>→ Decreased astrocyte activation &amp; macrophage infiltration</li> </ul>                                                                                                                                                                                                                                                                                                                                                                                                       | Improved locomotor function and motor coordination with acute C5aR1A treatment or C5-/-                                                                                                                                                                                                                                                                                                                               |
| Brennan et al., 2015                                      | C57bl6 mice         | Controlled impactor T9  | WT<br>WT + C5aR1A<br>C5aR1 -/-<br>C5aR1-/- → WT BMC   | Day 1-7            | 35 days  | <p><b>C5aR1-/-:</b></p> <ul style="list-style-type: none"> <li>→ Exacerbate lesion volume and demyelination chronically</li> <li>→ Reduce astrocyte activation and macrophage infiltration</li> <li>→ C5aR1-/- only in peripheral immune cells had no effect on outcomes</li> </ul> <p><b>C5aRA (PMX205): (Given first week):</b></p> <ul style="list-style-type: none"> <li>→ Reduced lesion volume and improved myelination chronically</li> <li>→ No effect on astrocyte activation, reduced macrophage infiltration</li> <li>→ Protective effects absent if treatment is given post-7 days</li> </ul> | <ul style="list-style-type: none"> <li>- C5aR1-/- and prolonged (Post 7 Days) treatment with C5aR1A resulted in worse chronic locomotor function and motor coordination</li> <li>- C5aR1-/- restricted to peripheral immune cells (CM Chimera) did not have an effect on the outcome</li> <li>- Acute (within 7 days) treatment with C5aR1A resulted in improved locomotor function and motor coordination</li> </ul> |

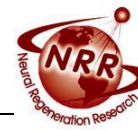

|                      |             |                        |                               |                         |                                                                                                                               |                                                                                                                                                                                                        |
|----------------------|-------------|------------------------|-------------------------------|-------------------------|-------------------------------------------------------------------------------------------------------------------------------|--------------------------------------------------------------------------------------------------------------------------------------------------------------------------------------------------------|
| Biggins et al., 2017 | C57bl6 mice | Controlled impactor T9 | WT                            | Pre-injury & for 7 Days | <b>C5aR2<sup>-/-</sup>:</b>                                                                                                   | → Worse lesion volumes<br>→ Did not impact neutrophil/macrophage infiltration<br><b>C5aR1A (PMX205):</b><br>→ Reduced lesion volume and demyelination<br>→ Reversed the effect of C5aR2 <sup>-/-</sup> |
|                      |             |                        | C5aR2 <sup>-/-</sup>          |                         | - C5aR2 <sup>-/-</sup> worsens chronic motor recovery<br>- C5aR1A improved motor recovery in WT and C5aR2 <sup>-/-</sup> mice |                                                                                                                                                                                                        |
|                      |             |                        | WT + C5aR1A                   |                         |                                                                                                                               |                                                                                                                                                                                                        |
|                      |             |                        | C5aR2 <sup>-/-</sup> + C5aR1A |                         |                                                                                                                               |                                                                                                                                                                                                        |

BMC: Bone-marrow chimera; C1-INH: C1 inhibitor; C5aR1A: C5aR1 antagonist; FcγR: Fc-gamma receptor; Ig: antibody; NA: not applicable; sCR1: soluble complement receptor 1; SCI: spinal cord injury; WT: wild-type.
